# Supplementary material for: TRAIL-dependent apoptosis of peritoneal mesothelial cells by NK cells promotes ovarian cancer invasion
Source: PubMed Central journal article supplement — iScience. 2023 Nov 7;26(12):108401. doi: 10.1016/j.isci.2023.108401 (PMC10692662; doi:10.1016/j.isci.2023.108401), 2023-11-07
Supplement: mmc1.pdf [file mmc1.pdf]

**Supplemental information**

**TRAIL-dependent apoptosis of peritoneal  
mesothelial cells by NK cells promotes  
ovarian cancer invasion**

**Anna Mary Steitz, Clarissa Schröder, Isabel Knuth, Corinna U. Keber, Leah Sommerfeld, Florian Finkernagel, Julia M. Jansen, Uwe Wagner, Sabine Müller-Brüsselbach, Thomas Worzfeld, Magdalena Huber, Vanessa M. Beutgen, Johannes Graumann, Elke Pogge von Strandmann, Rolf Müller, and Silke Reinartz**

## Supplemental Information

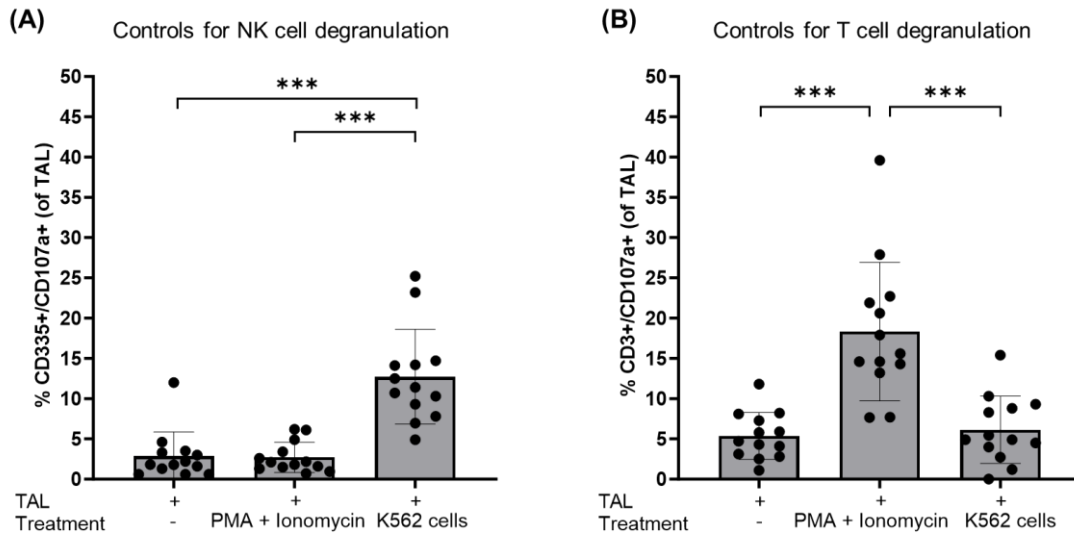

**Figure S1. Controls for flow cytometric determination of NK- and T cell degranulation, related to Fig. 1 and 2.**

(A, B) As a positive control for NK cell degranulation, TAL were co-cultured with the MHC1-deficient cell line K562 (ratio TAL:K562 10:1). As a positive control for T cell degranulation, TAL were treated with PMA and Ionomycin.

(A) The percentage of degranulating NK cells is shown gated on the CD335+/CD107a+ cells.

(B) The amount of degranulating T cells is shown as percentage of CD3+/CD107a+ cells. In both cases, untreated TAL were included as background controls for T and NK cell degranulation.

The mean of n=13 biological replicates of different patients is shown by horizontal bars and vertical error bars represent the standard deviation. \*\*\* FDR < 0.001; determined by paired t test and Benjamini-Hochberg adjustment.

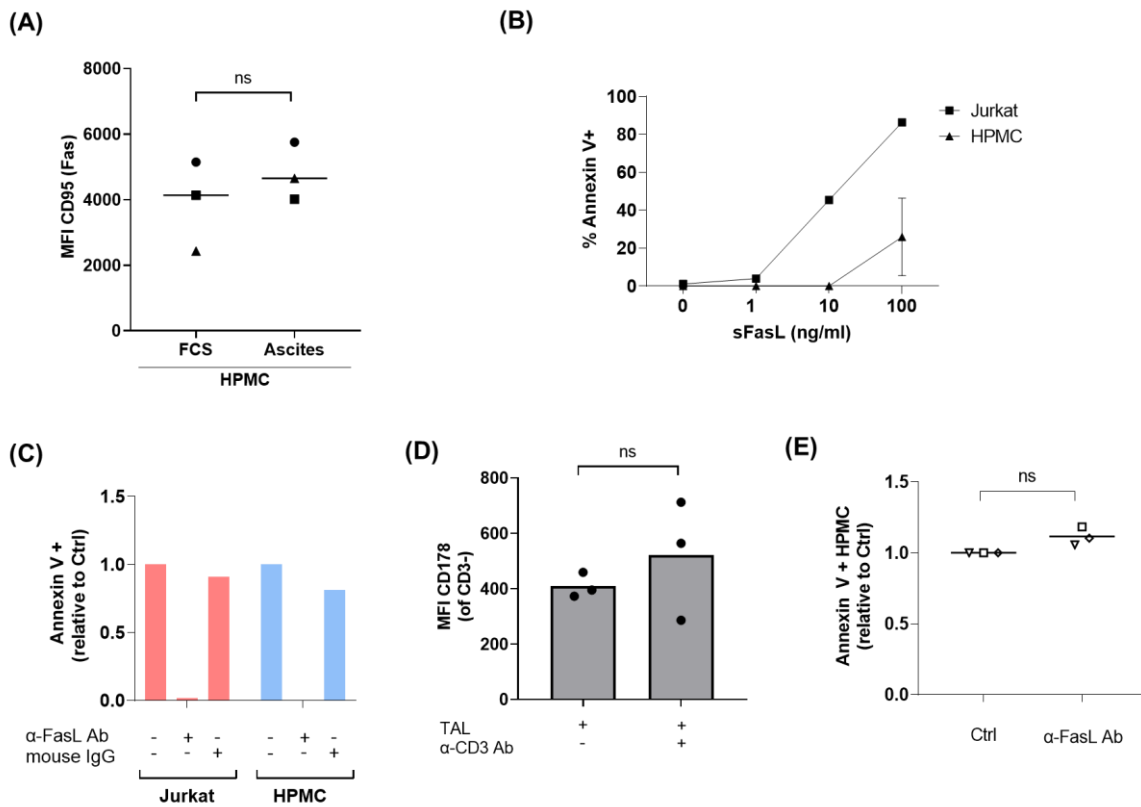

**Figure S2. Fas / FasL- independent cell death in HPMC after co-culture with TAL, related to Fig. 2.**

(A) Flow cytometric evaluation of Fas (CD95) expression in HPMC from HGSC patients cultured for 3 days in OCMI/5% FCS (FCS) or OCMI/50% ascites pool (Ascites). The geometric MFI is shown and was calculated after subtracting the isotype control (n=3 patients).

(B) Sensitivity of HPMC against crosslinked sFasL compared to a Fas-sensitive cell line (Jurkat). After 24h incubation, apoptosis was measured by flow cytometry after Annexin V/ PI staining. Background apoptosis of untreated cells was subtracted (n=3 HPMC).

(C) The specificity of killing induced by crosslinked sFasL in HPMC and Jurkat cells was evaluated by adding blocking antibody  $\alpha$ -FasL Ab. An irrelevant mouse IgG was included as control.

(D) The expression of FasL (CD178) on TAL (+/- stimulation with  $\alpha$ -CD3 Ab) was assessed by flow cytometry. The geometric MFI is shown and was calculated after subtracting the isotype control (n=3 patients).

(E) TAL activated with  $\alpha$ -CD3 Ab for 2 days were pretreated with blocking  $\alpha$ -FasL Ab or a mouse IgG control (Ctrl) prior to the co-culture with HPMC (Ratio TAL:HPMC 10:1; n=3 patients). HPMC apoptosis was evaluated by Annexin V /PI staining and expressed relative to Ctrl.

Horizontal bars show the mean. p values were determined by two-sided, paired t-test (ns = non-significant,  $p > 0.05$ ).

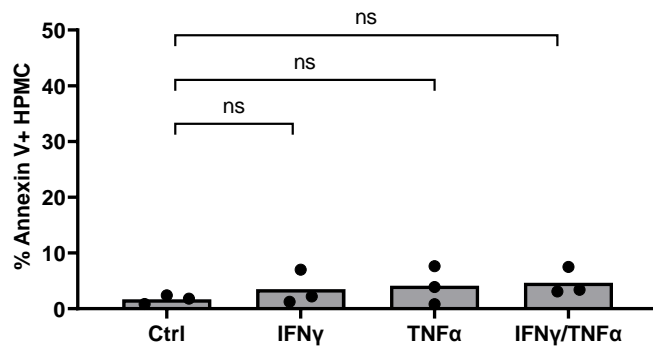

**Figure S3. TNF $\alpha$  und IFN $\gamma$  failed to induce cytotoxicity in HPMC, related to Fig. 2.**

HPMC from HGSC patients were treated for 6 hours with IFN $\gamma$  (20ng/ml), TNF $\alpha$  (100 ng/ml) alone or combined. Apoptosis induction in HPMC was determined by flow cytometric analysis after Annexin V / PI staining. Untreated cells were included as controls (Ctrl). The percentage of Annexin V + HPMC is given for n=3 patients. Horizontal bars show the mean. p values were determined by two-sided, paired t-test (ns= not significant).

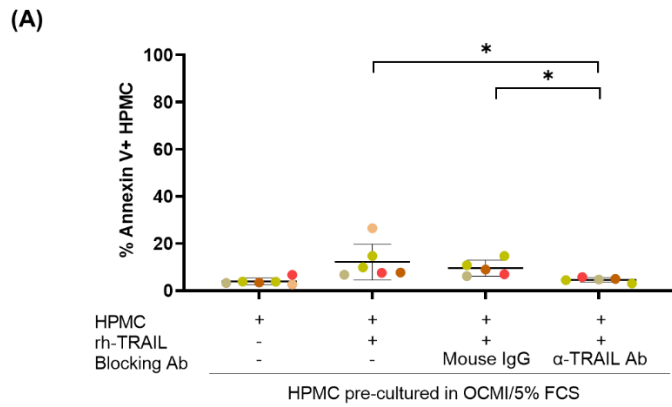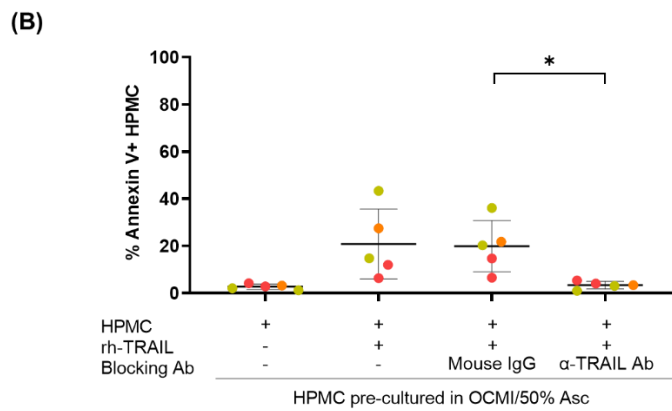

**Figure S4. Impact of ascites on the sensitivity of HPMC to apoptosis induction by rh-TRAIL, related to Fig. 2.**

(A, B) HPMC from HGSC patients were treated with rh-TRAIL for apoptosis induction as measured by flow cytometric Annexin V / PI staining. Where indicated, a blocking  $\alpha$ -TRAIL blocking Ab or an irrelevant mouse IgG as blocking control were added prior to incubation with rh-TRAIL. Experiments were conducted with HPMC pre-cultured in OCMI/5% FCS media (n=6 replicates as indicated by different colors) (A) and in OCMI/50% ascites media (n=5 as indicated by different colors) (B). The mean is shown by horizontal bars and vertical error bars represent the standard deviation. \* FDR < 0.05; determined by paired t test and Benjamini-Hochberg adjustment.

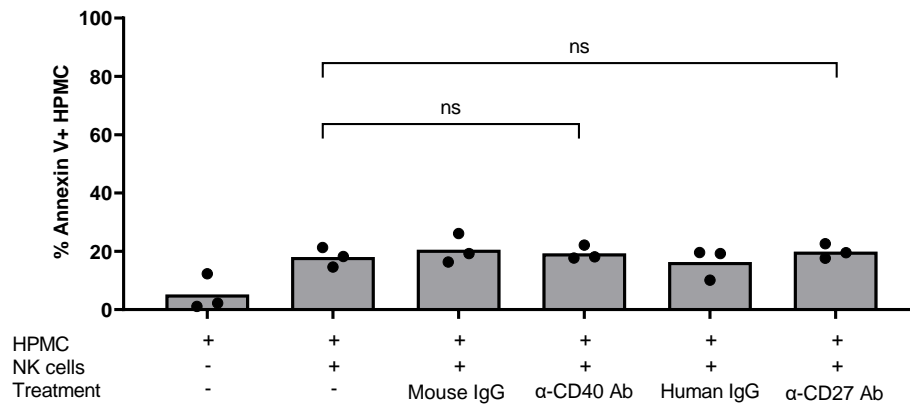

**Figure S5. Impact of CD40 and CD27 signaling on activation of ascites-derived NK cells, related to Fig. 3.**

NK cells were pre-treated with agonistic mouse  $\alpha$ -CD40 and human  $\alpha$ -CD27 Ab stimulation prior to HPMC co-culture. Irrelevant mouse and human IgG was included as controls. The amount of apoptotic HPMC (% Annexin V+ cells) after co-culture with NK-cells is presented (n=3 patients). The mean is shown by horizontal bars. p values were determined by two-sided, paired t-test and Benjamini-Hochberg adjustment (ns = non-significant).

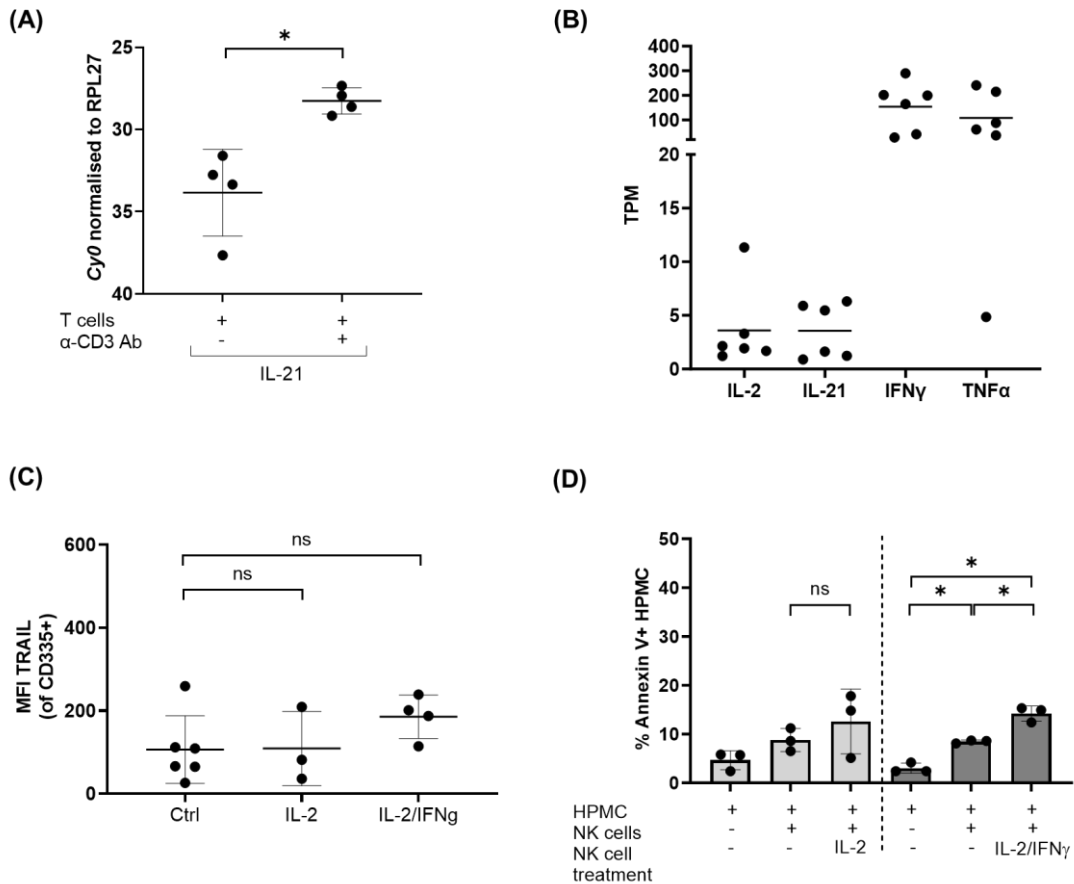

**Figure S6. TRAIL regulation in NK cells by cytokines secreted by activated T cells, related to Fig. 3.**

**(A)** Validation of IL-21 mRNA expression in ascites-derived T cells (+/-  $\alpha$ -CD3 Ab stimulation) by RT-qPCR (n=4 patients).

**(B)** RNASeq data showing the TPM values of IL-2, IL21, IFN $\gamma$  and TNF $\alpha$  gene expression in *ex vivo* TAT (n=6 patients). [S1]

**(C)** Flow cytometric evaluation of TRAIL expression on ascites-derived NK cells after stimulation with rh-IL-2 alone or combined with IFN $\gamma$ . NK cells were left unstimulated as background control. The geometric MFI is shown and was calculated after subtracting the isotype control (n=3-4 patients).

**(D)** The cytotoxicity of NK cells after stimulation with rh-IL-2 +/- rh-IFN $\gamma$  was determined after co-culture with HPMC. The amount of apoptotic HPMC (% Annexin V+ cells) is presented (n=3 patients).

The mean is shown by horizontal bars and vertical error bars represent the standard deviation. p values were determined by two-sided, paired t-test (ns = non-significant, \*p<0.05). For multiple testing in panel D, \* FDR < 0.05; determined by paired t test and Benjamini-Hochberg adjustment.

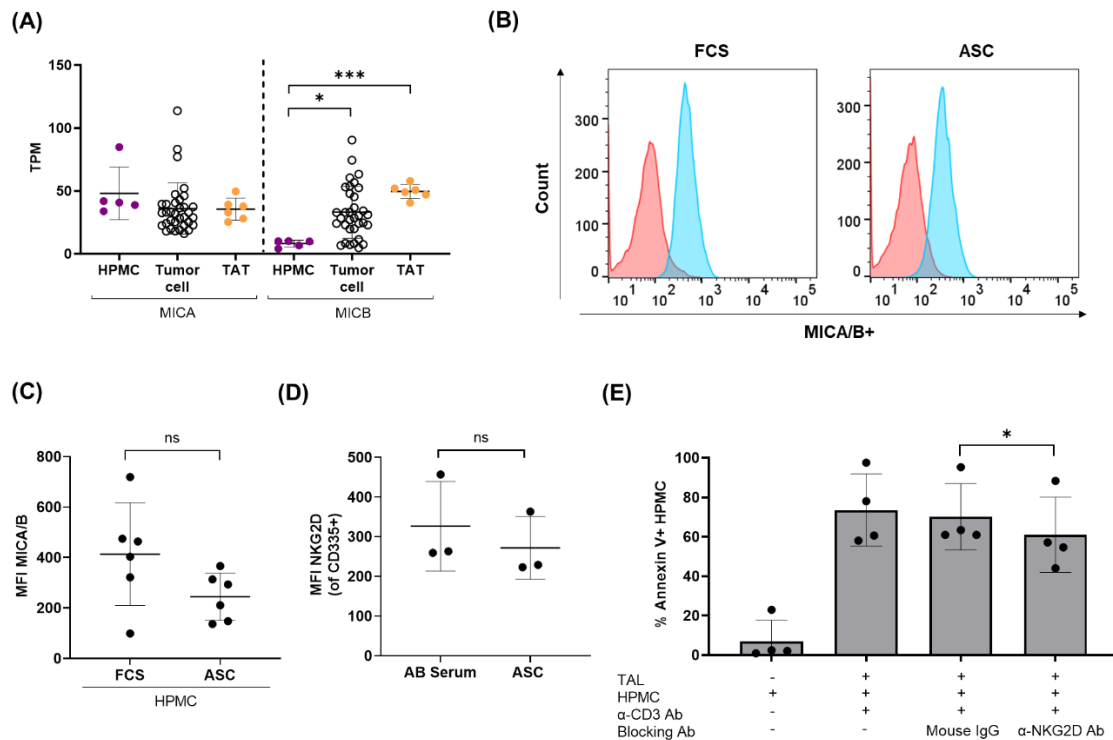

**Figure S7. Impact of NKG2D-MICA/B crosstalk on NK cell-mediated HPMC apoptosis, related to Fig. 4.**

**(A)** Expression of MICA and MICB genes in HPMC (from omentum), tumor cells and TAT (from ascites) from HGSC patients according to RNASeq data sets as described previously. [S1] TPM values are depicted from n= 5 HPMC, n=34 tumor cells and n=6 TAT of different patients.

**(B, C)** MICA/B expression in HPMC cultured either in OCMI/5% FCS (FCS) or OCMI/50% ascites (ASC) was validated on protein level by flow cytometry. **(B)** Representative histograms of MICA/B expression in HPMC. MICA/B expression is depicted in blue and the isotype control in red. **(C)** The geometric mean MFI of MICA/B expression (minus the isotype control) is shown for HPMC of n=6 patients.

**(D)** NKG2D expression on NK cells was determined by flow cytometry dependent on the culture in AB-serum or in ascites (n=3 patients).

**(E)** Apoptosis induction in HPMC by TAL (+/- α-CD3 Ab treatment) was measured by Annexin V staining of CD45- cells (n=4 patients). To evaluate the impact of NKG2D-based interaction on HPMC apoptosis, TAL were treated with α-NKG2D blocking Ab prior to HPMC co-culture. An irrelevant mouse IgG was included as control.

The mean is shown by horizontal bars and vertical error bars represent the standard deviation. p values were determined by two-sided, paired t-test (ns= non-significant, \*p<0.05). For multiple testing in panel A, \* FDR < 0.05; \*\*\* FDR < 0.001; determined by unpaired t test and Benjamini-Hochberg adjustment.



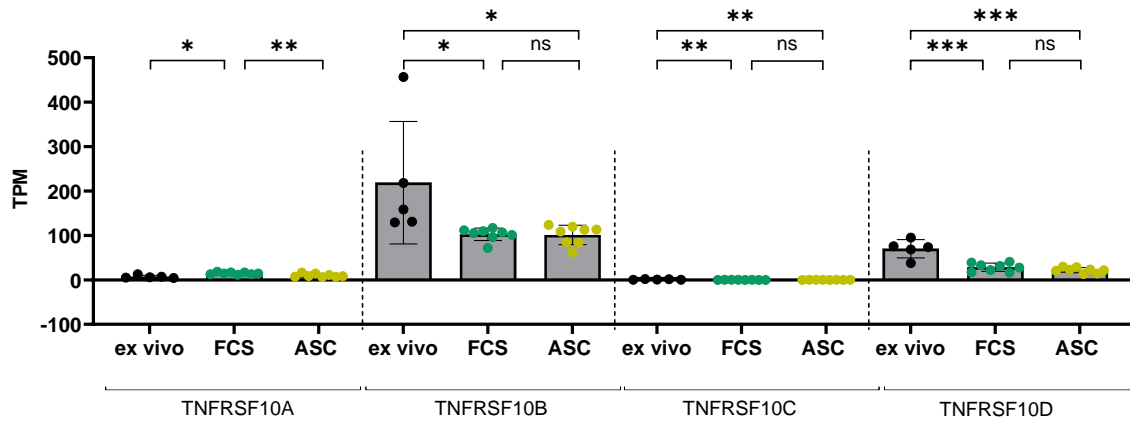

**Figure S8. Expression of TRAIL receptor genes in *ex vivo* compared to cultured HPMC from HGSC patients, related to Fig. 4.**

RNASeq data sets showing the TPM values of TNFRSF10A, TNFRSF10B, TNFRSF10C and TNFRSF10D gene expression are depicted for *ex vivo* HPMC (n=5 patients) and HPMC cultured in OCMI/5% FCS (FCS, n=8 patients) and in OCMI/50% ascites pool (ASC, n=8 patients). [S1] The mean is shown by horizontal bars and vertical error bars represent the standard deviation. \* FDR < 0.05; \*\* FDR < 0.01; \*\*\* FDR < 0.001; determined by unpaired t test and Benjamini-Hochberg adjustment (ns = non-significant).

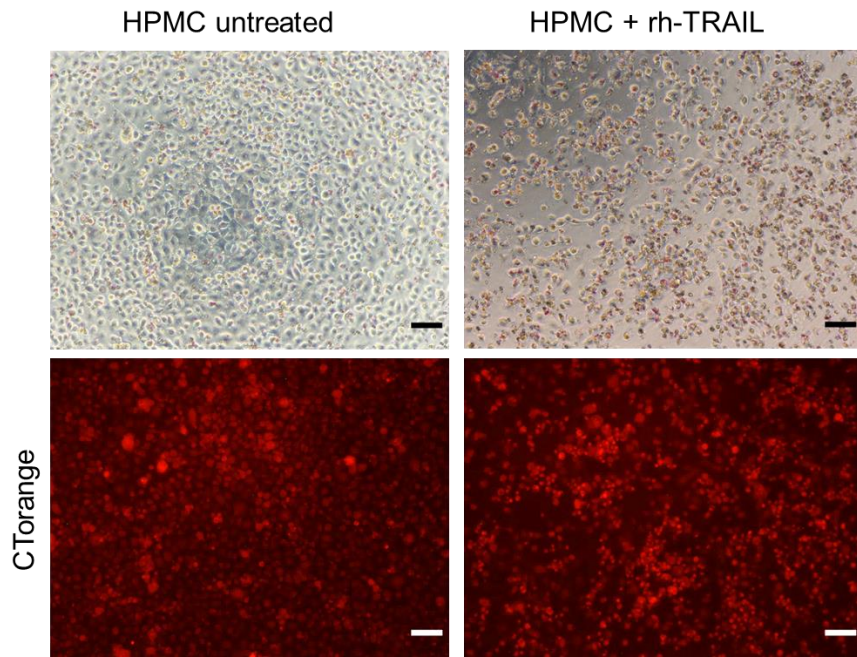

**Figure S9. Microscopic pictures depicting the TRAIL-mediated clearance of the HPMC monolayer, related to Fig. 6.**

HPMC stained with C Torange were grown to confluence on a collagen I gel overnight prior to treatment +/- rh-TRAIL. TRAIL-induced loss of HPMC is visible as holes in the monolayer and additionally detected under the fluorescence microscope as reduction of C Torange-labeled cells. Scale bars = 100 $\mu$ m

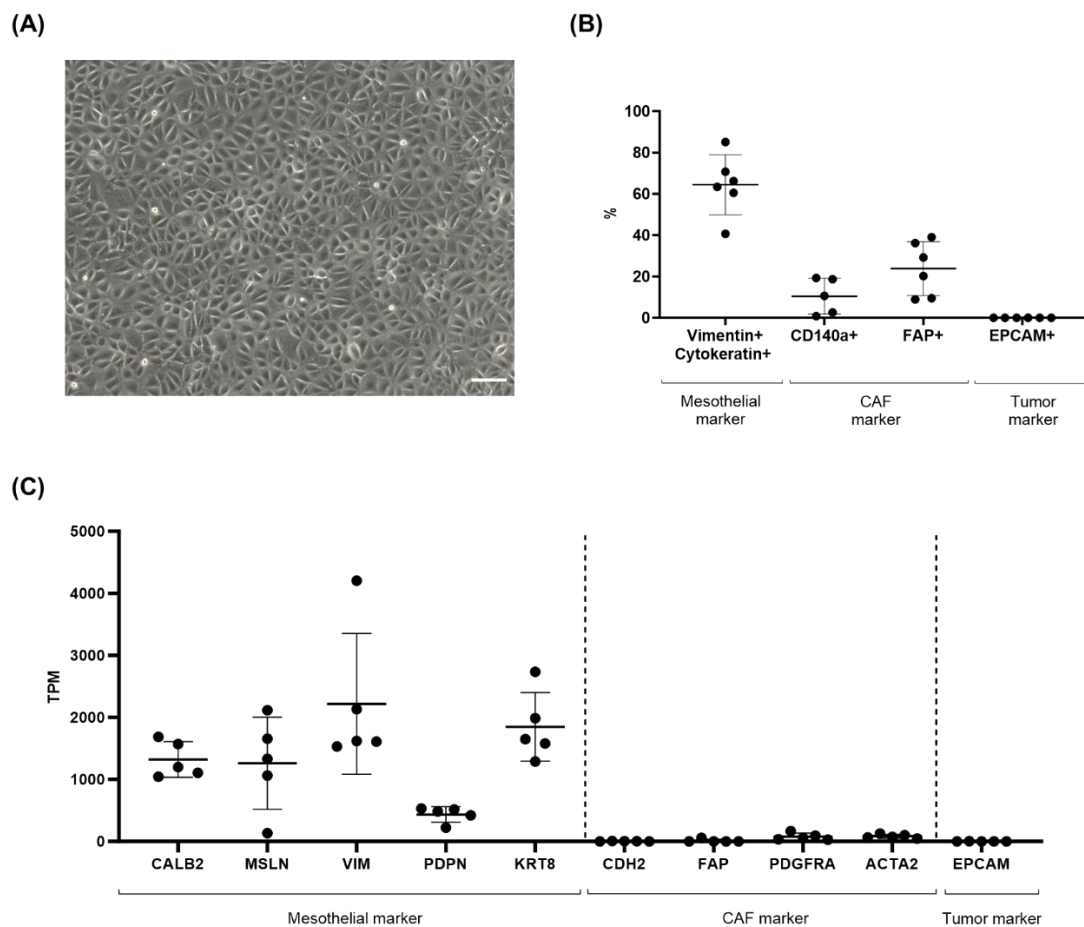

**Figure S10.**

**Validation of mesothelial phenotype of HPMC, related to Fig. 1-6.**

(A) Representative microscopic picture showing the cobblestone-like morphology of cultured HPMC. Scale bar = 100µm.

(B) Flow cytometric analysis of mesothelial marker (cytokeratin, vimentin), CAF-specific marker (FAP, CD140a) and tumor marker (EpCAM) in HPMC.

(C) RNASeq data sets showing the TPM values of mesothelial, CAF- and tumor-specific marker gene expression in HPMC after isolation from omentum (n=5 patients) [S1]. The mean is shown by horizontal bars and vertical error bars represent the standard deviation.

**Supplemental References**

S1. Sommerfeld L, Finkernagel F, Jansen JM, Wagner U, Nist A, Stiewe T, et al. The multicellular signalling network of ovarian cancer metastases. *Clinical and Translational Medicine* 2021. doi:10.1002/ctm2.633.
